# Supplementary material
Source: Springer Nature journal article supplement (https://www.springermedizin.de/resource/supplementary/12877_2011_778_MOESM2_ESM.pdf/9440256)
Supplement: MOESM2 [file 9440256]

# CONSORT 2010 Flow Diagram

## Enrolment

Assessed for eligibility (n=415)

Excluded (n=277) because of bad health and lack of interest

Randomized (n=138)

## Allocation

Allocated to control (n=61)

Allocated to intervention (n=77)  
- Received allocated intervention (n=41)  
- Did not receive allocated intervention (too ill, withdrew n=36)

## Follow-Up

Lost to follow-up (n=6)  
3 dead, 3 withdrew

Lost to follow-up (bad health, removal) (n=4)  
Discontinued intervention participated  $\leq 14$  times but interviewed (n=7)

## Analysis

Analysed (n= 55)

Analysed (n=37) including discontinued intervention (n=7)
